# Supplementary material
Source: MDPI journal article supplement (https://www.mdpi.com/2073-4395/12/11/2781)
Supplement: s1 [file s1]

**Table S1:** qPCR primers used for quantification and temperature profiles

| Target gene                                        | Primer        | Fragment size [bp] | Reference                 | Primer sequence         | Thermal profile                         | No of cycles |
|----------------------------------------------------|---------------|--------------------|---------------------------|-------------------------|-----------------------------------------|--------------|
| Bacterial 16S rRNA                                 | 341F          | 194                | Muyzer et al., 1993       | CCTACGGGAGGCAGCAG       | 95°C-15s/60°C-30s/72°C-30s /80°C-15s    | 35           |
|                                                    | 534           |                    |                           | ATTACCGCGGCTGCTGGCA     |                                         |              |
| Crenarchaeal 16S rRNA                              | Crenar771F    | 229                | Ochsenreiter et al., 2003 | ACGGTGAGGGATGAAAGCT     | 95°C-15s/55°C-30s/72°C-30s /80°C-15s    | 35           |
|                                                    | Crenar975R    |                    |                           | CGGCGTTGACTCCAATTG      |                                         |              |
| Fungal ITS                                         | ITS 3F        | 336                | White et al., 1990        | GCATCGATGAAGAACGCAGC    | 95°C-15s/55°C-30s/72°C-30s /80°C-15s    | 35           |
|                                                    | ITS 4R        |                    |                           | TCCTCCGCTTATTGATATGC    |                                         |              |
| Bacterial ammonium monooxygenase:<br><i>amoA</i>   | AmoA1F        | 491                | Leininger et al. 2006     | GGGGTTTCTACTGGTGGT      | 95°C-15s/55°C-30s/72°C-30s /80°C-15s    | 35           |
|                                                    | AmoA2R        |                    |                           | CCCCTCKGSAAAGCCTTCTTC   |                                         |              |
| Archaeal ammonium monooxygenase:<br><i>amoA</i>    | crenamoA23F   | 628                | Tournai et al., 2008      | ATGGTCTGGCTWAGACG       | 95°C-15s/55°C-30s/72°C-30s /80°C-15s    | 35           |
|                                                    | crenamoA616R  |                    |                           | GCCATCCATCTGTATGTCCA    |                                         |              |
| Cu-containing nitrite reductase:<br><i>nirK</i>    | nirK 876F     | 164                | Henry et al., 2004        | ATYGGCGGVCAYGGCGA       | 95°C-15s/63-58°C-30s/72°C-30s /80°C-15s | 6            |
|                                                    | nirK 1040R    |                    |                           | GCCTCGATCAGRTTGTGGTT    | 95°C-15s/58°C-30s/72°C-30s /80°C-15s    | 35           |
| Nitrite reductase:<br><i>nirS</i>                  | nirS4QF       | 410                | Throbäck et al., 2004     | G TSAACGYSAAGGARACSGG   | 95°C-15s/63-58°C-30s/72°C-30s /80°C-15s | 6            |
|                                                    | nirS6QR       |                    |                           | GASTTCGGRTGSGTCTTSAYGAA | 95°C-15s/58°C-30s/72°C-30s /80°C-15s    | 35           |
| Nitrous oxide reductase:<br><i>nosZ (cladel)</i>   | nosZ 1840F    | 267                | Henry et al., 2006        | CGCRACGGCAASAAGTSMSSGT  | 95°C-15s/54°C-30s/72°C-30s /80°C-15s    | 35           |
|                                                    | nosZ 2090R    |                    |                           | CAKRTGCAKSGCRTGGCAGAA   |                                         |              |
| Nitrous oxide reductase:<br><i>nosZ (cladelII)</i> | 1153 nosZ 8F  | 698                | Jones et al., 2013        | CTIGGICCIYTKAYAC        | 95°C-15s/54°C-30s/72°C-30s /80°C-15s    | 35           |
|                                                    | 1888 nosZ 29R |                    |                           | GCIGAICARAAITCBGTRC     |                                         |              |

**Table S2:** p-values for the main effects of the different treatments, sampling time and depth, and their interactions for quantitative real time PCR gene copy estimation (bacterial and Crenarchaeal 16S rRNA, fungal ITS, archaeal (AOA) and bacterial *amoA* (AOB), *nirK* and *nirS*, *nosZI* and *nosZII*) as determined by three-way ANOVA

| Source of variation      | Bacterial 16S rRNA | Crenarchaeal 16S rRNA | Fungal ITS        | <i>amoA</i> AOA   | <i>amoA</i> AOB   | <i>nirK</i>       | <i>nirS</i>       | <i>nosZI</i>      | <i>nosZII</i>     |
|--------------------------|--------------------|-----------------------|-------------------|-------------------|-------------------|-------------------|-------------------|-------------------|-------------------|
| Treatment                | <b>&lt;0.0001</b>  | <b>&lt;0.0001</b>     | <b>&lt;0.0001</b> | <b>&lt;0.0001</b> | <b>&lt;0.0001</b> | <b>0.0003</b>     | <b>&lt;0.0001</b> | <b>&lt;0.0001</b> | <b>&lt;0.0001</b> |
| Sampling                 | <b>&lt;0.0001</b>  | <b>&lt;0.0001</b>     | <b>&lt;0.0001</b> | <b>&lt;0.0001</b> | <b>&lt;0.0001</b> | <b>&lt;0.0001</b> | <b>&lt;0.0001</b> | <b>&lt;0.0001</b> | <b>&lt;0.0001</b> |
| Depth                    | <b>&lt;0.0001</b>  | 0.2965                | <b>&lt;0.0001</b> | <b>0.0004</b>     | <b>&lt;0.0001</b> | <b>0.0001</b>     | <b>&lt;0.0001</b> | <b>&lt;0.0001</b> | <b>&lt;0.0001</b> |
| Treatment:Sampling       | <b>&lt;0.0001</b>  | <b>&lt;0.0001</b>     | <b>0.0012</b>     | <b>0.0001</b>     | <b>&lt;0.0001</b> | 0.0904            | <b>&lt;0.0001</b> | <b>0.0010</b>     | <b>&lt;0.0001</b> |
| Treatment:Depth          | <b>&lt;0.0001</b>  | 0.8653                | <b>&lt;0.0001</b> | 0.1296            | <b>&lt;0.0001</b> | <b>0.0343</b>     | <b>&lt;0.0001</b> | <b>&lt;0.0001</b> | <b>&lt;0.0001</b> |
| Sampling:Depth           | 0.0726             | 0.1375                | 0.4755            | <b>0.0033</b>     | <b>&lt;0.0001</b> | 0.0943            | <b>0.0016</b>     | 0.2412            | 0.4379            |
| Treatment:Sampling:Depth | <b>0.0020</b>      | 0.4935                | <b>&lt;0.0001</b> | 0.2826            | <b>&lt;0.0001</b> | <b>0.0448</b>     | <b>0.0055</b>     | 0.1396            | 0.0744            |

**Table S3:** Bacterial, Crenarchaeal 16S rRNA and fungal ITS copy numbers in CON (control), INC (straw incorporated in 0 – 10 cm soil layer) and SRF (straw applied at the soil surface) soil treatments in presence/absence of slurry (S) at three sampling depths (cm) and three sampling points. Averages and standard errors of 4 replicates are shown

| Treatment | Depth (cm) | 16S rRNA bacteria                       |                                         |                                         | 16S rRNA Crenarchaea                    |                                         |                                         | ITS fungi                               |                                         |                                         |
|-----------|------------|-----------------------------------------|-----------------------------------------|-----------------------------------------|-----------------------------------------|-----------------------------------------|-----------------------------------------|-----------------------------------------|-----------------------------------------|-----------------------------------------|
|           |            | 1 <sup>st</sup> sampling point          | 2 <sup>nd</sup> sampling point          | 4 <sup>th</sup> sampling point          | 1 <sup>st</sup> sampling point          | 2 <sup>nd</sup> sampling point          | 4 <sup>th</sup> sampling point          | 1 <sup>st</sup> sampling point          | 2 <sup>nd</sup> sampling point          | 4 <sup>th</sup> sampling point          |
| SRF       | 0-1        | $1.83 \times 10^9 \pm 1.39 \times 10^8$ | $1.51 \times 10^9 \pm 1.47 \times 10^7$ | $2.55 \times 10^9 \pm 2.91 \times 10^8$ | $8.33 \times 10^7 \pm 6.39 \times 10^6$ | $7.56 \times 10^7 \pm 1.09 \times 10^7$ | $1.17 \times 10^8 \pm 1.06 \times 10^7$ | $1.60 \times 10^8 \pm 1.95 \times 10^7$ | $1.37 \times 10^8 \pm 1.62 \times 10^7$ | $3.27 \times 10^8 \pm 5.32 \times 10^7$ |
| INC       |            | $1.79 \times 10^9 \pm 1.49 \times 10^8$ | $1.57 \times 10^9 \pm 2.07 \times 10^8$ | $2.47 \times 10^9 \pm 1.23 \times 10^8$ | $9.17 \times 10^7 \pm 2.73 \times 10^6$ | $6.56 \times 10^7 \pm 8.77 \times 10^6$ | $1.02 \times 10^8 \pm 9.84 \times 10^6$ | $1.58 \times 10^8 \pm 2.83 \times 10^7$ | $1.25 \times 10^8 \pm 2.18 \times 10^7$ | $1.69 \times 10^8 \pm 7.03 \times 10^7$ |
| CON       |            | $1.80 \times 10^9 \pm 1.69 \times 10^8$ | $1.16 \times 10^9 \pm 9.28 \times 10^7$ | $1.99 \times 10^9 \pm 2.95 \times 10^8$ | $8.17 \times 10^7 \pm 7.94 \times 10^6$ | $5.80 \times 10^7 \pm 7.51 \times 10^6$ | $9.15 \times 10^7 \pm 1.07 \times 10^7$ | $8.47 \times 10^7 \pm 2.32 \times 10^6$ | $5.21 \times 10^7 \pm 6.51 \times 10^6$ | $1.65 \times 10^8 \pm 5.00 \times 10^7$ |
| SRF+S     |            | $3.08 \times 10^9 \pm 1.69 \times 10^8$ | $2.75 \times 10^9 \pm 2.32 \times 10^8$ | $3.52 \times 10^9 \pm 3.17 \times 10^8$ | $7.08 \times 10^7 \pm 7.51 \times 10^6$ | $8.25 \times 10^7 \pm 5.88 \times 10^6$ | $9.82 \times 10^7 \pm 6.55 \times 10^6$ | $2.24 \times 10^8 \pm 2.49 \times 10^7$ | $1.87 \times 10^8 \pm 1.35 \times 10^7$ | $3.56 \times 10^8 \pm 7.72 \times 10^7$ |
| INS+S     |            | $3.56 \times 10^9 \pm 5.16 \times 10^8$ | $4.10 \times 10^9 \pm 5.64 \times 10^8$ | $3.81 \times 10^9 \pm 1.48 \times 10^8$ | $5.84 \times 10^7 \pm 1.03 \times 10^7$ | $1.22 \times 10^8 \pm 1.33 \times 10^7$ | $1.15 \times 10^8 \pm 4.50 \times 10^6$ | $2.68 \times 10^8 \pm 6.21 \times 10^7$ | $4.60 \times 10^8 \pm 4.72 \times 10^7$ | $2.06 \times 10^8 \pm 1.43 \times 10^7$ |
| CON+S     |            | $4.64 \times 10^9 \pm 5.82 \times 10^8$ | $7.03 \times 10^9 \pm 7.71 \times 10^8$ | $4.97 \times 10^9 \pm 4.47 \times 10^8$ | $7.55 \times 10^7 \pm 5.81 \times 10^6$ | $1.22 \times 10^8 \pm 1.13 \times 10^7$ | $1.35 \times 10^8 \pm 1.79 \times 10^7$ | $1.12 \times 10^8 \pm 1.33 \times 10^7$ | $1.95 \times 10^8 \pm 2.23 \times 10^7$ | $3.29 \times 10^8 \pm 4.99 \times 10^7$ |
| SRF       | 1-10       | $1.33 \times 10^9 \pm 5.72 \times 10^7$ | $1.45 \times 10^9 \pm 1.85 \times 10^8$ | $1.87 \times 10^9 \pm 9.43 \times 10^7$ | $8.20 \times 10^7 \pm 3.22 \times 10^6$ | $1.02 \times 10^8 \pm 1.55 \times 10^7$ | $1.23 \times 10^8 \pm 3.64 \times 10^6$ | $8.79 \times 10^7 \pm 1.38 \times 10^7$ | $7.00 \times 10^7 \pm 1.63 \times 10^7$ | $1.21 \times 10^8 \pm 7.96 \times 10^6$ |
| INC       |            | $1.48 \times 10^9 \pm 1.41 \times 10^8$ | $9.41 \times 10^8 \pm 6.13 \times 10^7$ | $2.13 \times 10^9 \pm 2.61 \times 10^8$ | $9.36 \times 10^7 \pm 5.20 \times 10^6$ | $6.53 \times 10^7 \pm 5.80 \times 10^6$ | $1.14 \times 10^8 \pm 5.20 \times 10^6$ | $1.50 \times 10^8 \pm 1.19 \times 10^7$ | $1.53 \times 10^8 \pm 2.50 \times 10^7$ | $2.26 \times 10^8 \pm 2.37 \times 10^7$ |
| CON       |            | $1.60 \times 10^9 \pm 6.12 \times 10^7$ | $8.83 \times 10^8 \pm 2.18 \times 10^7$ | $1.69 \times 10^9 \pm 1.62 \times 10^8$ | $8.41 \times 10^7 \pm 4.42 \times 10^6$ | $6.31 \times 10^7 \pm 3.24 \times 10^6$ | $1.02 \times 10^8 \pm 5.72 \times 10^6$ | $5.45 \times 10^7 \pm 3.02 \times 10^6$ | $3.96 \times 10^7 \pm 3.37 \times 10^6$ | $9.44 \times 10^7 \pm 1.01 \times 10^7$ |
| SRF+S     |            | $1.19 \times 10^9 \pm 5.87 \times 10^7$ | $1.59 \times 10^9 \pm 1.97 \times 10^8$ | $2.09 \times 10^9 \pm 1.74 \times 10^8$ | $7.98 \times 10^7 \pm 3.06 \times 10^6$ | $8.13 \times 10^7 \pm 7.65 \times 10^6$ | $1.10 \times 10^8 \pm 1.14 \times 10^7$ | $8.62 \times 10^7 \pm 8.75 \times 10^6$ | $7.04 \times 10^7 \pm 1.50 \times 10^7$ | $9.64 \times 10^7 \pm 1.70 \times 10^7$ |
| INS+S     |            | $1.51 \times 10^9 \pm 1.50 \times 10^8$ | $1.89 \times 10^9 \pm 2.06 \times 10^8$ | $2.46 \times 10^9 \pm 8.29 \times 10^7$ | $8.23 \times 10^7 \pm 4.83 \times 10^6$ | $9.98 \times 10^7 \pm 7.26 \times 10^6$ | $1.17 \times 10^8 \pm 1.05 \times 10^7$ | $2.08 \times 10^8 \pm 1.05 \times 10^7$ | $2.39 \times 10^8 \pm 2.52 \times 10^7$ | $3.60 \times 10^8 \pm 5.65 \times 10^7$ |
| CON+S     |            | $1.37 \times 10^9 \pm 4.66 \times 10^7$ | $1.93 \times 10^9 \pm 9.97 \times 10^7$ | $2.36 \times 10^9 \pm 2.97 \times 10^8$ | $8.09 \times 10^7 \pm 6.57 \times 10^6$ | $1.05 \times 10^8 \pm 9.01 \times 10^6$ | $1.37 \times 10^8 \pm 7.42 \times 10^6$ | $5.36 \times 10^7 \pm 4.80 \times 10^6$ | $8.26 \times 10^7 \pm 1.41 \times 10^7$ | $1.47 \times 10^8 \pm 2.12 \times 10^7$ |
| SRF       | 10-20      | $1.52 \times 10^9 \pm 7.21 \times 10^7$ | $1.68 \times 10^9 \pm 2.41 \times 10^8$ | $2.01 \times 10^9 \pm 1.36 \times 10^8$ | $7.59 \times 10^7 \pm 2.87 \times 10^6$ | $9.62 \times 10^7 \pm 9.40 \times 10^6$ | $1.31 \times 10^8 \pm 5.71 \times 10^6$ | $5.37 \times 10^7 \pm 1.43 \times 10^6$ | $7.37 \times 10^7 \pm 1.19 \times 10^7$ | $1.43 \times 10^8 \pm 4.83 \times 10^7$ |
| INC       |            | $1.85 \times 10^9 \pm 1.23 \times 10^8$ | $1.53 \times 10^9 \pm 1.83 \times 10^8$ | $2.36 \times 10^9 \pm 8.27 \times 10^7$ | $8.75 \times 10^7 \pm 7.74 \times 10^6$ | $4.97 \times 10^7 \pm 3.21 \times 10^6$ | $1.27 \times 10^8 \pm 1.53 \times 10^7$ | $6.83 \times 10^7 \pm 8.61 \times 10^6$ | $4.39 \times 10^7 \pm 4.45 \times 10^6$ | $1.21 \times 10^8 \pm 2.33 \times 10^7$ |
| CON       |            | $1.53 \times 10^9 \pm 3.79 \times 10^7$ | $1.03 \times 10^9 \pm 2.57 \times 10^7$ | $1.93 \times 10^9 \pm 1.17 \times 10^8$ | $8.90 \times 10^7 \pm 5.06 \times 10^6$ | $5.79 \times 10^7 \pm 2.61 \times 10^6$ | $1.10 \times 10^8 \pm 1.13 \times 10^7$ | $6.41 \times 10^7 \pm 7.92 \times 10^6$ | $3.87 \times 10^7 \pm 4.48 \times 10^6$ | $1.09 \times 10^8 \pm 2.00 \times 10^7$ |
| SRF+S     |            | $1.66 \times 10^9 \pm 4.84 \times 10^7$ | $1.79 \times 10^9 \pm 9.97 \times 10^7$ | $2.36 \times 10^9 \pm 2.14 \times 10^8$ | $7.07 \times 10^7 \pm 2.52 \times 10^6$ | $8.12 \times 10^7 \pm 7.94 \times 10^6$ | $1.06 \times 10^8 \pm 6.49 \times 10^6$ | $4.74 \times 10^7 \pm 2.12 \times 10^6$ | $5.77 \times 10^7 \pm 3.27 \times 10^6$ | $7.48 \times 10^7 \pm 9.50 \times 10^6$ |
| INS+S     |            | $1.94 \times 10^9 \pm 1.48 \times 10^8$ | $2.60 \times 10^9 \pm 5.40 \times 10^7$ | $3.24 \times 10^9 \pm 2.13 \times 10^8$ | $7.71 \times 10^7 \pm 8.23 \times 10^6$ | $1.03 \times 10^8 \pm 6.86 \times 10^6$ | $1.18 \times 10^8 \pm 2.29 \times 10^7$ | $7.96 \times 10^7 \pm 1.58 \times 10^7$ | $1.44 \times 10^8 \pm 3.92 \times 10^7$ | $1.09 \times 10^8 \pm 1.06 \times 10^7$ |
| CON+S     |            | $1.37 \times 10^9 \pm 1.20 \times 10^8$ | $2.16 \times 10^9 \pm 2.23 \times 10^8$ | $2.76 \times 10^9 \pm 3.01 \times 10^8$ | $7.34 \times 10^7 \pm 2.64 \times 10^6$ | $1.03 \times 10^8 \pm 2.12 \times 10^6$ | $1.33 \times 10^8 \pm 1.90 \times 10^7$ | $6.63 \times 10^7 \pm 4.40 \times 10^6$ | $9.88 \times 10^7 \pm 2.68 \times 10^7$ | $1.84 \times 10^8 \pm 7.45 \times 10^7$ |

**Table S4:** Crenarchaeal (AOA) and bacterial (AOB) *amoA* gene abundances in CON, INC and SRF soil treatments in presence/absence of slurry (S) at three sampling depths (cm) and three sampling points. Averages and standard errors of 4 replicates are shown

| Treatment | Depth (cm) | <i>amoA</i> AOA                |                        |                                |                        |                                |                        | <i>amoA</i> AOB                |                        |                                |                        |                                |                        |
|-----------|------------|--------------------------------|------------------------|--------------------------------|------------------------|--------------------------------|------------------------|--------------------------------|------------------------|--------------------------------|------------------------|--------------------------------|------------------------|
|           |            | 1 <sup>st</sup> sampling point |                        | 2 <sup>nd</sup> sampling point |                        | 4 <sup>th</sup> sampling point |                        | 1 <sup>st</sup> sampling point |                        | 2 <sup>nd</sup> sampling point |                        | 4 <sup>th</sup> sampling point |                        |
| SRF       | 0-1        | 1.18×10 <sup>7</sup>           | ± 1.02×10 <sup>6</sup> | 9.26×10 <sup>6</sup>           | ± 1.30×10 <sup>6</sup> | 1.87×10 <sup>7</sup>           | ± 1.05×10 <sup>6</sup> | 1.06×10 <sup>6</sup>           | ± 7.91×10 <sup>4</sup> | 1.00×10 <sup>6</sup>           | ± 1.39×10 <sup>5</sup> | 2.66×10 <sup>6</sup>           | ± 4.46×10 <sup>5</sup> |
| INC       |            | 1.53×10 <sup>7</sup>           | ± 1.02×10 <sup>6</sup> | 1.02×10 <sup>7</sup>           | ± 1.19×10 <sup>6</sup> | 2.06×10 <sup>7</sup>           | ± 1.13×10 <sup>6</sup> | 1.28×10 <sup>6</sup>           | ± 7.77×10 <sup>4</sup> | 8.80×10 <sup>5</sup>           | ± 8.11×10 <sup>4</sup> | 2.13×10 <sup>6</sup>           | ± 4.05×10 <sup>5</sup> |
| CON       |            | 1.29×10 <sup>7</sup>           | ± 1.51×10 <sup>6</sup> | 8.23×10 <sup>6</sup>           | ± 1.39×10 <sup>6</sup> | 1.65×10 <sup>7</sup>           | ± 2.04×10 <sup>6</sup> | 1.42×10 <sup>6</sup>           | ± 1.07×10 <sup>5</sup> | 8.00×10 <sup>5</sup>           | ± 1.32×10 <sup>5</sup> | 1.36×10 <sup>6</sup>           | ± 1.56×10 <sup>5</sup> |
| SRF+S     |            | 9.11×10 <sup>6</sup>           | ± 4.12×10 <sup>5</sup> | 1.43×10 <sup>7</sup>           | ± 1.71×10 <sup>6</sup> | 2.44×10 <sup>7</sup>           | ± 2.16×10 <sup>6</sup> | 2.20×10 <sup>6</sup>           | ± 4.99×10 <sup>5</sup> | 1.19×10 <sup>7</sup>           | ± 1.89×10 <sup>6</sup> | 1.24×10 <sup>7</sup>           | ± 3.60×10 <sup>6</sup> |
| INS+S     |            | 9.35×10 <sup>6</sup>           | ± 1.92×10 <sup>6</sup> | 2.24×10 <sup>7</sup>           | ± 2.69×10 <sup>6</sup> | 3.08×10 <sup>7</sup>           | ± 2.06×10 <sup>6</sup> | 2.37×10 <sup>6</sup>           | ± 5.12×10 <sup>5</sup> | 9.93×10 <sup>6</sup>           | ± 1.52×10 <sup>6</sup> | 1.67×10 <sup>7</sup>           | ± 3.17×10 <sup>6</sup> |
| CON+S     |            | 1.26×10 <sup>7</sup>           | ± 1.38×10 <sup>6</sup> | 1.96×10 <sup>7</sup>           | ± 2.95×10 <sup>6</sup> | 2.89×10 <sup>7</sup>           | ± 4.56×10 <sup>6</sup> | 2.71×10 <sup>6</sup>           | ± 3.95×10 <sup>5</sup> | 1.31×10 <sup>7</sup>           | ± 3.75×10 <sup>6</sup> | 3.61×10 <sup>7</sup>           | ± 5.41×10 <sup>6</sup> |
| SRF       | 1-10       | 1.40×10 <sup>7</sup>           | ± 3.66×10 <sup>5</sup> | 1.76×10 <sup>7</sup>           | ± 2.52×10 <sup>6</sup> | 2.63×10 <sup>7</sup>           | ± 1.65×10 <sup>6</sup> | 9.14×10 <sup>5</sup>           | ± 4.37×10 <sup>4</sup> | 1.09×10 <sup>6</sup>           | ± 1.74×10 <sup>5</sup> | 1.42×10 <sup>6</sup>           | ± 1.65×10 <sup>5</sup> |
| INC       |            | 1.42×10 <sup>7</sup>           | ± 7.06×10 <sup>5</sup> | 1.06×10 <sup>7</sup>           | ± 1.43×10 <sup>6</sup> | 2.10×10 <sup>7</sup>           | ± 1.09×10 <sup>6</sup> | 1.10×10 <sup>6</sup>           | ± 1.31×10 <sup>5</sup> | 1.04×10 <sup>6</sup>           | ± 2.31×10 <sup>5</sup> | 1.66×10 <sup>6</sup>           | ± 9.10×10 <sup>4</sup> |
| CON       |            | 1.31×10 <sup>7</sup>           | ± 8.33×10 <sup>5</sup> | 9.96×10 <sup>6</sup>           | ± 7.84×10 <sup>5</sup> | 2.06×10 <sup>7</sup>           | ± 1.51×10 <sup>6</sup> | 1.10×10 <sup>6</sup>           | ± 1.18×10 <sup>5</sup> | 5.49×10 <sup>5</sup>           | ± 3.54×10 <sup>4</sup> | 1.09×10 <sup>6</sup>           | ± 1.38×10 <sup>5</sup> |
| SRF+S     |            | 1.08×10 <sup>7</sup>           | ± 6.30×10 <sup>5</sup> | 1.30×10 <sup>7</sup>           | ± 6.29×10 <sup>5</sup> | 2.77×10 <sup>7</sup>           | ± 5.25×10 <sup>6</sup> | 1.03×10 <sup>6</sup>           | ± 2.90×10 <sup>4</sup> | 1.99×10 <sup>6</sup>           | ± 3.17×10 <sup>5</sup> | 2.50×10 <sup>6</sup>           | ± 4.08×10 <sup>5</sup> |
| INS+S     |            | 1.29×10 <sup>7</sup>           | ± 9.42×10 <sup>5</sup> | 1.85×10 <sup>7</sup>           | ± 7.99×10 <sup>5</sup> | 3.22×10 <sup>7</sup>           | ± 2.76×10 <sup>6</sup> | 1.78×10 <sup>6</sup>           | ± 2.85×10 <sup>5</sup> | 2.53×10 <sup>6</sup>           | ± 3.95×10 <sup>5</sup> | 4.15×10 <sup>6</sup>           | ± 5.72×10 <sup>5</sup> |
| CON+S     |            | 1.26×10 <sup>7</sup>           | ± 1.77×10 <sup>6</sup> | 1.96×10 <sup>7</sup>           | ± 1.77×10 <sup>6</sup> | 3.70×10 <sup>7</sup>           | ± 4.69×10 <sup>6</sup> | 9.85×10 <sup>5</sup>           | ± 1.38×10 <sup>5</sup> | 2.25×10 <sup>6</sup>           | ± 4.96×10 <sup>5</sup> | 4.68×10 <sup>6</sup>           | ± 8.10×10 <sup>5</sup> |
| SRF       | 10-20      | 1.29×10 <sup>7</sup>           | ± 1.36×10 <sup>6</sup> | 1.72×10 <sup>7</sup>           | ± 1.69×10 <sup>6</sup> | 2.73×10 <sup>7</sup>           | ± 1.18×10 <sup>6</sup> | 8.05×10 <sup>5</sup>           | ± 1.14×10 <sup>5</sup> | 7.88×10 <sup>5</sup>           | ± 6.69×10 <sup>4</sup> | 1.39×10 <sup>6</sup>           | ± 1.09×10 <sup>5</sup> |
| INC       |            | 1.31×10 <sup>7</sup>           | ± 1.82×10 <sup>6</sup> | 8.42×10 <sup>6</sup>           | ± 7.15×10 <sup>5</sup> | 2.94×10 <sup>7</sup>           | ± 1.83×10 <sup>6</sup> | 8.74×10 <sup>5</sup>           | ± 1.70×10 <sup>5</sup> | 6.05×10 <sup>5</sup>           | ± 6.36×10 <sup>4</sup> | 2.11×10 <sup>6</sup>           | ± 5.31×10 <sup>5</sup> |
| CON       |            | 1.53×10 <sup>7</sup>           | ± 8.76×10 <sup>5</sup> | 9.64×10 <sup>6</sup>           | ± 5.73×10 <sup>5</sup> | 2.27×10 <sup>7</sup>           | ± 2.60×10 <sup>6</sup> | 1.03×10 <sup>6</sup>           | ± 4.07×10 <sup>4</sup> | 5.21×10 <sup>5</sup>           | ± 6.47×10 <sup>4</sup> | 9.26×10 <sup>5</sup>           | ± 1.64×10 <sup>5</sup> |
| SRF+S     |            | 9.74×10 <sup>6</sup>           | ± 3.26×10 <sup>5</sup> | 1.38×10 <sup>7</sup>           | ± 1.62×10 <sup>6</sup> | 2.68×10 <sup>7</sup>           | ± 2.73×10 <sup>6</sup> | 6.41×10 <sup>5</sup>           | ± 6.52×10 <sup>4</sup> | 7.17×10 <sup>5</sup>           | ± 1.28×10 <sup>5</sup> | 1.03×10 <sup>6</sup>           | ± 1.59×10 <sup>5</sup> |
| INS+S     |            | 1.18×10 <sup>7</sup>           | ± 1.31×10 <sup>6</sup> | 1.86×10 <sup>7</sup>           | ± 2.51×10 <sup>6</sup> | 3.14×10 <sup>7</sup>           | ± 1.54×10 <sup>6</sup> | 1.06×10 <sup>6</sup>           | ± 1.59×10 <sup>5</sup> | 1.46×10 <sup>6</sup>           | ± 3.50×10 <sup>5</sup> | 1.47×10 <sup>6</sup>           | ± 1.28×10 <sup>5</sup> |
| CON+S     |            | 1.36×10 <sup>7</sup>           | ± 8.47×10 <sup>5</sup> | 1.85×10 <sup>7</sup>           | ± 1.42×10 <sup>6</sup> | 3.62×10 <sup>7</sup>           | ± 6.82×10 <sup>6</sup> | 9.19×10 <sup>5</sup>           | ± 8.03×10 <sup>4</sup> | 1.13×10 <sup>6</sup>           | ± 2.38×10 <sup>5</sup> | 1.55×10 <sup>6</sup>           | ± 2.26×10 <sup>5</sup> |

**Table S5:** *nirK* and *nirS* gene abundances in CON, INC and SRF soil treatments in presence/absence of slurry (S) at three sampling depths (cm) and three sampling points. Averages and standard errors of 4 replicates are shown

| Treatment | Depth (cm) | <i>nirK</i>                    |                        |                                |                        |                                |                        |  |  | <i>nirS</i>                    |                        |                                |                        |                                |                        |  |  |
|-----------|------------|--------------------------------|------------------------|--------------------------------|------------------------|--------------------------------|------------------------|--|--|--------------------------------|------------------------|--------------------------------|------------------------|--------------------------------|------------------------|--|--|
|           |            | 1 <sup>st</sup> sampling point |                        | 2 <sup>nd</sup> sampling point |                        | 4 <sup>th</sup> sampling point |                        |  |  | 1 <sup>st</sup> sampling point |                        | 2 <sup>nd</sup> sampling point |                        | 4 <sup>th</sup> sampling point |                        |  |  |
| SRF       | 0-1        | 3.97×10 <sup>8</sup>           | ± 2.35×10 <sup>7</sup> | 2.75×10 <sup>8</sup>           | ± 3.31×10 <sup>7</sup> | 6.12×10 <sup>8</sup>           | ± 6.36×10 <sup>7</sup> |  |  | 4.34×10 <sup>7</sup>           | ± 2.01×10 <sup>6</sup> | 3.17×10 <sup>7</sup>           | ± 2.10×10 <sup>6</sup> | 5.40×10 <sup>7</sup>           | ± 4.61×10 <sup>6</sup> |  |  |
| INC       |            | 3.73×10 <sup>8</sup>           | ± 9.67×10 <sup>6</sup> | 2.99×10 <sup>8</sup>           | ± 3.35×10 <sup>7</sup> | 5.54×10 <sup>8</sup>           | ± 7.72×10 <sup>7</sup> |  |  | 4.58×10 <sup>7</sup>           | ± 3.45×10 <sup>6</sup> | 3.45×10 <sup>7</sup>           | ± 3.47×10 <sup>6</sup> | 4.35×10 <sup>7</sup>           | ± 3.00×10 <sup>6</sup> |  |  |
| CON       |            | 3.24×10 <sup>8</sup>           | ± 1.40×10 <sup>7</sup> | 2.17×10 <sup>8</sup>           | ± 2.64×10 <sup>7</sup> | 3.87×10 <sup>8</sup>           | ± 2.94×10 <sup>7</sup> |  |  | 3.58×10 <sup>7</sup>           | ± 1.93×10 <sup>6</sup> | 2.33×10 <sup>7</sup>           | ± 2.91×10 <sup>6</sup> | 3.55×10 <sup>7</sup>           | ± 6.79×10 <sup>6</sup> |  |  |
| SRF+S     |            | 2.72×10 <sup>8</sup>           | ± 3.61×10 <sup>7</sup> | 4.33×10 <sup>8</sup>           | ± 3.69×10 <sup>7</sup> | 6.16×10 <sup>8</sup>           | ± 1.32×10 <sup>8</sup> |  |  | 5.86×10 <sup>7</sup>           | ± 9.09×10 <sup>6</sup> | 6.69×10 <sup>7</sup>           | ± 9.85×10 <sup>6</sup> | 8.52×10 <sup>7</sup>           | ± 7.21×10 <sup>6</sup> |  |  |
| INS+S     |            | 2.81×10 <sup>8</sup>           | ± 6.73×10 <sup>7</sup> | 5.67×10 <sup>8</sup>           | ± 5.81×10 <sup>7</sup> | 5.46×10 <sup>8</sup>           | ± 2.86×10 <sup>7</sup> |  |  | 7.32×10 <sup>7</sup>           | ± 1.43×10 <sup>7</sup> | 9.65×10 <sup>7</sup>           | ± 1.69×10 <sup>7</sup> | 8.99×10 <sup>7</sup>           | ± 7.18×10 <sup>6</sup> |  |  |
| CON+S     |            | 3.62×10 <sup>8</sup>           | ± 5.50×10 <sup>7</sup> | 5.75×10 <sup>8</sup>           | ± 4.33×10 <sup>7</sup> | 7.50×10 <sup>8</sup>           | ± 9.78×10 <sup>7</sup> |  |  | 1.01×10 <sup>8</sup>           | ± 7.78×10 <sup>6</sup> | 1.67×10 <sup>8</sup>           | ± 1.54×10 <sup>7</sup> | 1.26×10 <sup>8</sup>           | ± 1.44×10 <sup>7</sup> |  |  |
| SRF       | 1-10       | 3.91×10 <sup>8</sup>           | ± 3.75×10 <sup>7</sup> | 3.44×10 <sup>8</sup>           | ± 6.80×10 <sup>7</sup> | 5.46×10 <sup>8</sup>           | ± 5.75×10 <sup>7</sup> |  |  | 3.64×10 <sup>7</sup>           | ± 2.12×10 <sup>6</sup> | 3.67×10 <sup>7</sup>           | ± 6.07×10 <sup>6</sup> | 4.16×10 <sup>7</sup>           | ± 4.55×10 <sup>6</sup> |  |  |
| INC       |            | 3.55×10 <sup>8</sup>           | ± 2.92×10 <sup>7</sup> | 3.32×10 <sup>8</sup>           | ± 4.49×10 <sup>7</sup> | 5.72×10 <sup>8</sup>           | ± 9.32×10 <sup>7</sup> |  |  | 4.52×10 <sup>7</sup>           | ± 3.15×10 <sup>6</sup> | 3.25×10 <sup>7</sup>           | ± 5.19×10 <sup>6</sup> | 5.19×10 <sup>7</sup>           | ± 3.54×10 <sup>6</sup> |  |  |
| CON       |            | 2.79×10 <sup>8</sup>           | ± 2.60×10 <sup>7</sup> | 2.09×10 <sup>8</sup>           | ± 1.27×10 <sup>7</sup> | 4.27×10 <sup>8</sup>           | ± 4.77×10 <sup>7</sup> |  |  | 3.27×10 <sup>7</sup>           | ± 2.88×10 <sup>6</sup> | 2.12×10 <sup>7</sup>           | ± 1.35×10 <sup>6</sup> | 3.53×10 <sup>7</sup>           | ± 1.78×10 <sup>6</sup> |  |  |
| SRF+S     |            | 3.33×10 <sup>8</sup>           | ± 1.82×10 <sup>7</sup> | 3.21×10 <sup>8</sup>           | ± 2.59×10 <sup>7</sup> | 4.11×10 <sup>8</sup>           | ± 6.95×10 <sup>7</sup> |  |  | 3.09×10 <sup>7</sup>           | ± 1.48×10 <sup>6</sup> | 3.52×10 <sup>7</sup>           | ± 2.27×10 <sup>6</sup> | 5.77×10 <sup>7</sup>           | ± 8.64×10 <sup>6</sup> |  |  |
| INS+S     |            | 4.19×10 <sup>8</sup>           | ± 3.41×10 <sup>7</sup> | 4.25×10 <sup>8</sup>           | ± 2.81×10 <sup>7</sup> | 5.70×10 <sup>8</sup>           | ± 8.24×10 <sup>7</sup> |  |  | 4.58×10 <sup>7</sup>           | ± 5.62×10 <sup>6</sup> | 4.48×10 <sup>7</sup>           | ± 3.07×10 <sup>6</sup> | 7.99×10 <sup>7</sup>           | ± 4.90×10 <sup>6</sup> |  |  |
| CON+S     |            | 3.46×10 <sup>8</sup>           | ± 2.08×10 <sup>7</sup> | 3.71×10 <sup>8</sup>           | ± 4.73×10 <sup>7</sup> | 6.28×10 <sup>8</sup>           | ± 8.51×10 <sup>7</sup> |  |  | 3.15×10 <sup>7</sup>           | ± 2.13×10 <sup>6</sup> | 4.12×10 <sup>7</sup>           | ± 5.75×10 <sup>6</sup> | 6.27×10 <sup>7</sup>           | ± 6.18×10 <sup>6</sup> |  |  |
| SRF       | 10-20      | 3.07×10 <sup>8</sup>           | ± 1.48×10 <sup>7</sup> | 2.76×10 <sup>8</sup>           | ± 1.05×10 <sup>7</sup> | 4.60×10 <sup>8</sup>           | ± 5.42×10 <sup>7</sup> |  |  | 3.29×10 <sup>7</sup>           | ± 2.30×10 <sup>6</sup> | 3.17×10 <sup>7</sup>           | ± 2.99×10 <sup>6</sup> | 4.65×10 <sup>7</sup>           | ± 2.59×10 <sup>6</sup> |  |  |
| INC       |            | 3.08×10 <sup>8</sup>           | ± 4.24×10 <sup>7</sup> | 2.31×10 <sup>8</sup>           | ± 1.67×10 <sup>7</sup> | 6.25×10 <sup>8</sup>           | ± 1.80×10 <sup>8</sup> |  |  | 3.82×10 <sup>7</sup>           | ± 5.28×10 <sup>6</sup> | 2.03×10 <sup>7</sup>           | ± 1.46×10 <sup>6</sup> | 5.21×10 <sup>7</sup>           | ± 9.97×10 <sup>6</sup> |  |  |
| CON       |            | 3.49×10 <sup>8</sup>           | ± 2.64×10 <sup>7</sup> | 1.78×10 <sup>8</sup>           | ± 8.78×10 <sup>6</sup> | 4.04×10 <sup>8</sup>           | ± 7.95×10 <sup>7</sup> |  |  | 3.77×10 <sup>7</sup>           | ± 2.31×10 <sup>6</sup> | 1.74×10 <sup>7</sup>           | ± 1.61×10 <sup>6</sup> | 3.58×10 <sup>7</sup>           | ± 4.86×10 <sup>6</sup> |  |  |
| SRF+S     |            | 2.67×10 <sup>8</sup>           | ± 1.99×10 <sup>7</sup> | 2.81×10 <sup>8</sup>           | ± 2.11×10 <sup>7</sup> | 3.84×10 <sup>8</sup>           | ± 5.56×10 <sup>7</sup> |  |  | 2.75×10 <sup>7</sup>           | ± 5.87×10 <sup>5</sup> | 3.13×10 <sup>7</sup>           | ± 2.22×10 <sup>6</sup> | 5.24×10 <sup>7</sup>           | ± 5.11×10 <sup>6</sup> |  |  |
| INS+S     |            | 3.70×10 <sup>8</sup>           | ± 4.49×10 <sup>7</sup> | 4.25×10 <sup>8</sup>           | ± 5.32×10 <sup>7</sup> | 5.20×10 <sup>8</sup>           | ± 6.65×10 <sup>7</sup> |  |  | 3.72×10 <sup>7</sup>           | ± 4.45×10 <sup>6</sup> | 4.35×10 <sup>7</sup>           | ± 5.69×10 <sup>6</sup> | 6.96×10 <sup>7</sup>           | ± 3.55×10 <sup>6</sup> |  |  |
| CON+S     |            | 3.19×10 <sup>8</sup>           | ± 1.89×10 <sup>7</sup> | 3.77×10 <sup>8</sup>           | ± 1.50×10 <sup>7</sup> | 5.80×10 <sup>8</sup>           | ± 1.00×10 <sup>8</sup> |  |  | 3.57×10 <sup>7</sup>           | ± 1.86×10 <sup>6</sup> | 3.86×10 <sup>7</sup>           | ± 3.69×10 <sup>6</sup> | 5.57×10 <sup>7</sup>           | ± 7.67×10 <sup>6</sup> |  |  |

**Table S6:** *nosZI* and *nosZII* gene abundances in CON, INC and SRF soil treatments in presence/absence of slurry (S) at three sampling depths (cm) and three sampling points. Averages and standard errors of 4 replicates are shown

|           |            | <i>nosZI</i>                   |                        |                                |                        |                                |                        |                                |                        | <i>nosZII</i>                  |                        |                                |                        |  |  |  |  |
|-----------|------------|--------------------------------|------------------------|--------------------------------|------------------------|--------------------------------|------------------------|--------------------------------|------------------------|--------------------------------|------------------------|--------------------------------|------------------------|--|--|--|--|
| Treatment | Depth (cm) | 1 <sup>st</sup> sampling point |                        | 2 <sup>nd</sup> sampling point |                        | 4 <sup>th</sup> sampling point |                        | 1 <sup>st</sup> sampling point |                        | 2 <sup>nd</sup> sampling point |                        | 4 <sup>th</sup> sampling point |                        |  |  |  |  |
| SRF       | 0-1        | 2.19×10 <sup>8</sup>           | ± 5.44×10 <sup>6</sup> | 1.32×10 <sup>8</sup>           | ± 9.66×10 <sup>6</sup> | 3.02×10 <sup>8</sup>           | ± 2.50×10 <sup>7</sup> | 2.13×10 <sup>7</sup>           | ± 2.50×10 <sup>6</sup> | 1.48×10 <sup>7</sup>           | ± 9.21×10 <sup>5</sup> | 3.06×10 <sup>7</sup>           | ± 2.71×10 <sup>6</sup> |  |  |  |  |
| INC       |            | 2.43×10 <sup>8</sup>           | ± 2.10×10 <sup>7</sup> | 1.53×10 <sup>8</sup>           | ± 2.51×10 <sup>7</sup> | 2.89×10 <sup>8</sup>           | ± 3.34×10 <sup>7</sup> | 1.64×10 <sup>7</sup>           | ± 1.02×10 <sup>6</sup> | 1.25×10 <sup>7</sup>           | ± 9.24×10 <sup>5</sup> | 1.88×10 <sup>7</sup>           | ± 2.07×10 <sup>6</sup> |  |  |  |  |
| CON       |            | 1.88×10 <sup>8</sup>           | ± 1.69×10 <sup>7</sup> | 9.84×10 <sup>7</sup>           | ± 1.64×10 <sup>7</sup> | 1.89×10 <sup>8</sup>           | ± 3.04×10 <sup>7</sup> | 1.85×10 <sup>7</sup>           | ± 2.21×10 <sup>6</sup> | 1.04×10 <sup>7</sup>           | ± 1.36×10 <sup>6</sup> | 1.73×10 <sup>7</sup>           | ± 3.06×10 <sup>6</sup> |  |  |  |  |
| SRF+S     |            | 2.16×10 <sup>8</sup>           | ± 2.88×10 <sup>7</sup> | 2.78×10 <sup>8</sup>           | ± 3.33×10 <sup>7</sup> | 3.57×10 <sup>8</sup>           | ± 6.22×10 <sup>7</sup> | 1.97×10 <sup>7</sup>           | ± 3.27×10 <sup>6</sup> | 3.12×10 <sup>7</sup>           | ± 3.51×10 <sup>6</sup> | 3.49×10 <sup>7</sup>           | ± 4.47×10 <sup>6</sup> |  |  |  |  |
| INS+S     |            | 2.78×10 <sup>8</sup>           | ± 5.13×10 <sup>7</sup> | 4.46×10 <sup>8</sup>           | ± 7.98×10 <sup>7</sup> | 4.13×10 <sup>8</sup>           | ± 2.44×10 <sup>7</sup> | 2.78×10 <sup>7</sup>           | ± 3.74×10 <sup>6</sup> | 4.22×10 <sup>7</sup>           | ± 7.00×10 <sup>6</sup> | 3.62×10 <sup>7</sup>           | ± 4.17×10 <sup>6</sup> |  |  |  |  |
| CON+S     |            | 3.91×10 <sup>8</sup>           | ± 3.95×10 <sup>7</sup> | 5.89×10 <sup>8</sup>           | ± 4.34×10 <sup>7</sup> | 5.19×10 <sup>8</sup>           | ± 5.03×10 <sup>7</sup> | 2.97×10 <sup>7</sup>           | ± 3.21×10 <sup>6</sup> | 4.59×10 <sup>7</sup>           | ± 5.11×10 <sup>6</sup> | 4.53×10 <sup>7</sup>           | ± 3.00×10 <sup>6</sup> |  |  |  |  |
| SRF       | 1-10       | 1.87×10 <sup>8</sup>           | ± 1.46×10 <sup>7</sup> | 1.64×10 <sup>8</sup>           | ± 3.70×10 <sup>7</sup> | 2.38×10 <sup>8</sup>           | ± 2.64×10 <sup>7</sup> | 1.46×10 <sup>7</sup>           | ± 8.89×10 <sup>5</sup> | 1.68×10 <sup>7</sup>           | ± 2.67×10 <sup>6</sup> | 2.01×10 <sup>7</sup>           | ± 1.73×10 <sup>6</sup> |  |  |  |  |
| INC       |            | 2.33×10 <sup>8</sup>           | ± 2.48×10 <sup>7</sup> | 1.65×10 <sup>8</sup>           | ± 3.54×10 <sup>7</sup> | 2.84×10 <sup>8</sup>           | ± 2.99×10 <sup>7</sup> | 1.64×10 <sup>7</sup>           | ± 8.69×10 <sup>5</sup> | 1.43×10 <sup>7</sup>           | ± 2.87×10 <sup>6</sup> | 2.54×10 <sup>7</sup>           | ± 1.02×10 <sup>6</sup> |  |  |  |  |
| CON       |            | 1.51×10 <sup>8</sup>           | ± 1.60×10 <sup>7</sup> | 8.79×10 <sup>7</sup>           | ± 9.85×10 <sup>6</sup> | 1.95×10 <sup>8</sup>           | ± 2.22×10 <sup>7</sup> | 1.42×10 <sup>7</sup>           | ± 1.04×10 <sup>6</sup> | 9.64×10 <sup>6</sup>           | ± 7.71×10 <sup>5</sup> | 1.99×10 <sup>7</sup>           | ± 1.86×10 <sup>6</sup> |  |  |  |  |
| SRF+S     |            | 1.48×10 <sup>8</sup>           | ± 1.28×10 <sup>7</sup> | 1.52×10 <sup>8</sup>           | ± 1.31×10 <sup>7</sup> | 2.15×10 <sup>8</sup>           | ± 4.58×10 <sup>7</sup> | 1.03×10 <sup>7</sup>           | ± 3.35×10 <sup>5</sup> | 1.36×10 <sup>7</sup>           | ± 7.67×10 <sup>5</sup> | 1.75×10 <sup>7</sup>           | ± 2.97×10 <sup>6</sup> |  |  |  |  |
| INS+S     |            | 2.33×10 <sup>8</sup>           | ± 3.55×10 <sup>7</sup> | 2.40×10 <sup>8</sup>           | ± 2.07×10 <sup>7</sup> | 3.25×10 <sup>8</sup>           | ± 2.94×10 <sup>7</sup> | 1.87×10 <sup>7</sup>           | ± 2.39×10 <sup>6</sup> | 2.85×10 <sup>7</sup>           | ± 1.36×10 <sup>6</sup> | 3.47×10 <sup>7</sup>           | ± 2.55×10 <sup>6</sup> |  |  |  |  |
| CON+S     |            | 1.65×10 <sup>8</sup>           | ± 7.22×10 <sup>6</sup> | 1.90×10 <sup>8</sup>           | ± 3.00×10 <sup>7</sup> | 3.26×10 <sup>8</sup>           | ± 4.30×10 <sup>7</sup> | 1.13×10 <sup>7</sup>           | ± 1.29×10 <sup>6</sup> | 1.91×10 <sup>7</sup>           | ± 2.55×10 <sup>6</sup> | 2.70×10 <sup>7</sup>           | ± 2.43×10 <sup>6</sup> |  |  |  |  |
| SRF       | 10-20      | 1.62×10 <sup>8</sup>           | ± 1.29×10 <sup>7</sup> | 1.34×10 <sup>8</sup>           | ± 1.56×10 <sup>7</sup> | 2.26×10 <sup>8</sup>           | ± 2.55×10 <sup>7</sup> | 1.11×10 <sup>7</sup>           | ± 1.11×10 <sup>6</sup> | 1.16×10 <sup>7</sup>           | ± 1.70×10 <sup>6</sup> | 1.73×10 <sup>7</sup>           | ± 8.82×10 <sup>5</sup> |  |  |  |  |
| INC       |            | 1.89×10 <sup>8</sup>           | ± 3.69×10 <sup>7</sup> | 8.32×10 <sup>7</sup>           | ± 1.04×10 <sup>7</sup> | 2.84×10 <sup>8</sup>           | ± 8.16×10 <sup>7</sup> | 1.15×10 <sup>7</sup>           | ± 1.87×10 <sup>6</sup> | 7.30×10 <sup>6</sup>           | ± 6.03×10 <sup>5</sup> | 2.62×10 <sup>7</sup>           | ± 5.75×10 <sup>6</sup> |  |  |  |  |
| CON       |            | 1.37×10 <sup>8</sup>           | ± 3.18×10 <sup>7</sup> | 7.04×10 <sup>7</sup>           | ± 7.32×10 <sup>6</sup> | 1.65×10 <sup>8</sup>           | ± 3.14×10 <sup>7</sup> | 1.41×10 <sup>7</sup>           | ± 6.20×10 <sup>5</sup> | 7.64×10 <sup>6</sup>           | ± 7.11×10 <sup>5</sup> | 1.63×10 <sup>7</sup>           | ± 2.35×10 <sup>6</sup> |  |  |  |  |
| SRF+S     |            | 1.14×10 <sup>8</sup>           | ± 7.00×10 <sup>6</sup> | 1.22×10 <sup>8</sup>           | ± 1.10×10 <sup>7</sup> | 1.79×10 <sup>8</sup>           | ± 2.65×10 <sup>7</sup> | 7.95×10 <sup>6</sup>           | ± 1.62×10 <sup>5</sup> | 1.05×10 <sup>7</sup>           | ± 1.61×10 <sup>6</sup> | 1.45×10 <sup>7</sup>           | ± 1.45×10 <sup>6</sup> |  |  |  |  |
| INS+S     |            | 1.60×10 <sup>8</sup>           | ± 2.00×10 <sup>7</sup> | 1.85×10 <sup>8</sup>           | ± 2.85×10 <sup>7</sup> | 2.49×10 <sup>8</sup>           | ± 1.89×10 <sup>7</sup> | 1.13×10 <sup>7</sup>           | ± 1.63×10 <sup>6</sup> | 1.92×10 <sup>7</sup>           | ± 2.01×10 <sup>6</sup> | 2.17×10 <sup>7</sup>           | ± 4.78×10 <sup>5</sup> |  |  |  |  |
| CON+S     |            | 1.77×10 <sup>8</sup>           | ± 1.44×10 <sup>7</sup> | 1.84×10 <sup>8</sup>           | ± 2.26×10 <sup>7</sup> | 2.45×10 <sup>8</sup>           | ± 3.90×10 <sup>7</sup> | 1.19×10 <sup>7</sup>           | ± 1.13×10 <sup>6</sup> | 1.67×10 <sup>7</sup>           | ± 2.76×10 <sup>6</sup> | 2.27×10 <sup>7</sup>           | ± 3.49×10 <sup>6</sup> |  |  |  |  |

**Table S7:** *amoA* AOA/AOB, *nirK/nirS* and *nosZI/nosZII* gene abundance ratios in CON, INC and SRF soil treatments in presence/absence of slurry (S) at three sampling depths (cm) and three sampling points. Averages and standard errors of 4 replicates are shown

| Treatment | Depth (cm)   | AOA/AOB                        |                                |                                | <i>nirK/nirS</i>               |                                |                                | <i>nosZI/nosZII</i>            |                                |                                |
|-----------|--------------|--------------------------------|--------------------------------|--------------------------------|--------------------------------|--------------------------------|--------------------------------|--------------------------------|--------------------------------|--------------------------------|
|           |              | 1 <sup>st</sup> sampling point | 2 <sup>nd</sup> sampling point | 4 <sup>th</sup> sampling point | 1 <sup>st</sup> sampling point | 2 <sup>nd</sup> sampling point | 4 <sup>th</sup> sampling point | 1 <sup>st</sup> sampling point | 2 <sup>nd</sup> sampling point | 4 <sup>th</sup> sampling point |
| SRF       | <b>0-1</b>   | 11.1 ± 0.8                     | 11.0 ± 2.3                     | 7.5 ± 0.9                      | 9.2 ± 0.7                      | 8.6 ± 0.5                      | 11.7 ± 1.7                     | 10.6 ± 1.1                     | 9.0 ± 0.8                      | 9.9 ± 0.6                      |
| INC       |              | 12.0 ± 0.5                     | 11.5 ± 0.5                     | 9.7 ± 1.4                      | 8.2 ± 0.5                      | 8.8 ± 0.7                      | 12.7 ± 1.2                     | 14.9 ± 1.6                     | 12.2 ± 1.8                     | 17.0 ± 2.6                     |
| CON       |              | 9.1 ± 0.7                      | 10.3 ± 0.1                     | 12.1 ± 0.5                     | 9.1 ± 0.5                      | 9.4 ± 0.6                      | 11.9 ± 1.9                     | 10.3 ± 0.4                     | 9.6 ± 1.5                      | 11.4 ± 1.3                     |
| SRF+S     |              | 4.7 ± 0.9                      | 1.3 ± 0.2                      | 2.5 ± 0.6                      | 4.7 ± 0.1                      | 6.6 ± 0.4                      | 7.0 ± 1.2                      | 11.2 ± 1.2                     | 8.9 ± 0.3                      | 10.0 ± 0.8                     |
| INS+S     |              | 4.0 ± 0.4                      | 2.3 ± 0.2                      | 2.0 ± 0.4                      | 3.7 ± 0.3                      | 6.2 ± 0.7                      | 6.2 ± 0.7                      | 9.8 ± 0.8                      | 10.5 ± 0.4                     | 11.8 ± 1.2                     |
| CON+S     |              | 4.8 ± 0.3                      | 2.1 ± 0.9                      | 0.8 ± 0.1                      | 3.6 ± 0.5                      | 3.5 ± 0.4                      | 5.9 ± 0.2                      | 13.2 ± 0.4                     | 13.2 ± 1.3                     | 11.4 ± 0.5                     |
| SRF       | <b>1-10</b>  | 15.5 ± 0.9                     | 16.3 ± 0.8                     | 19.0 ± 1.1                     | 10.7 ± 0.6                     | 9.2 ± 0.3                      | 13.4 ± 1.5                     | 12.8 ± 0.6                     | 9.7 ± 0.9                      | 11.8 ± 0.5                     |
| INC       |              | 13.3 ± 1.0                     | 11.1 ± 1.3                     | 12.8 ± 1.3                     | 7.9 ± 0.4                      | 10.5 ± 0.9                     | 11.0 ± 1.6                     | 14.1 ± 0.9                     | 11.6 ± 0.9                     | 11.1 ± 0.8                     |
| CON       |              | 12.2 ± 0.8                     | 18.3 ± 1.5                     | 19.6 ± 2.2                     | 8.6 ± 0.6                      | 9.9 ± 0.4                      | 12.0 ± 1.1                     | 10.6 ± 0.6                     | 9.1 ± 0.4                      | 9.8 ± 0.7                      |
| SRF+S     |              | 10.5 ± 0.5                     | 7.4 ± 1.8                      | 11.4 ± 2.2                     | 10.8 ± 0.7                     | 9.1 ± 0.4                      | 7.1 ± 0.6                      | 14.3 ± 1.1                     | 11.3 ± 1.2                     | 11.8 ± 0.9                     |
| INS+S     |              | 7.7 ± 1.0                      | 8.0 ± 1.6                      | 8.3 ± 1.5                      | 9.3 ± 0.6                      | 9.5 ± 0.5                      | 7.2 ± 1.1                      | 12.5 ± 1.2                     | 8.4 ± 0.7                      | 9.4 ± 0.7                      |
| CON+S     |              | 12.9 ± 0.9                     | 9.6 ± 1.5                      | 8.2 ± 1.1                      | 11.0 ± 0.2                     | 9.0 ± 0.3                      | 9.9 ± 0.5                      | 15.0 ± 1.3                     | 9.8 ± 0.4                      | 12.0 ± 0.8                     |
| SRF       | <b>10-20</b> | 16.3 ± 1.2                     | 21.7 ± 0.9                     | 20.0 ± 1.6                     | 9.4 ± 0.4                      | 9.0 ± 1.0                      | 9.8 ± 0.8                      | 14.7 ± 0.5                     | 11.7 ± 0.4                     | 12.9 ± 1.0                     |
| INC       |              | 15.5 ± 1.3                     | 14.2 ± 1.4                     | 15.7 ± 2.5                     | 8.1 ± 0.2                      | 11.4 ± 0.6                     | 11.5 ± 1.1                     | 16.1 ± 0.8                     | 11.3 ± 0.9                     | 10.4 ± 0.9                     |
| CON       |              | 14.8 ± 0.4                     | 19.2 ± 2.1                     | 25.4 ± 1.8                     | 9.3 ± 0.4                      | 10.4 ± 0.6                     | 11.1 ± 0.9                     | 9.9 ± 2.4                      | 9.3 ± 0.7                      | 10.2 ± 1.3                     |
| SRF+S     |              | 15.6 ± 1.4                     | 20.0 ± 2.3                     | 27.2 ± 3.2                     | 9.6 ± 0.5                      | 9.1 ± 0.9                      | 7.3 ± 1.0                      | 14.3 ± 0.6                     | 12.0 ± 0.8                     | 12.1 ± 0.8                     |
| INS+S     |              | 11.4 ± 0.7                     | 14.5 ± 1.8                     | 21.9 ± 2.3                     | 10.1 ± 1.0                     | 9.8 ± 0.4                      | 7.6 ± 1.3                      | 14.4 ± 0.7                     | 9.6 ± 0.1                      | 11.5 ± 0.8                     |
| CON+S     |              | 15.0 ± 1.2                     | 17.8 ± 2.5                     | 23.1 ± 2.7                     | 8.9 ± 0.4                      | 9.9 ± 0.6                      | 10.3 ± 0.5                     | 14.9 ± 0.5                     | 11.2 ± 0.6                     | 10.8 ± 0.7                     |

**Table S8:** ITS/16S rRNA bacteria, *nirK*/16S rRNA bacteria and *nirS*/16S rRNA bacteria gene abundance ratios in CON, INC and SRF soil treatments in presence/absence of slurry (S) at three sampling depths (cm) and three sampling points. Averages and standard errors of 4 replicates are shown

| Treatment | Depth (cm) | ITS/16S rRNA bact.             |         |                                |         |                                |         |  | <i>nirK</i> /16S rRNA bact.    |       |                                |       |                                |       | <i>nirS</i> /16S rRNA bact.    |         |                                |         |                                |         |
|-----------|------------|--------------------------------|---------|--------------------------------|---------|--------------------------------|---------|--|--------------------------------|-------|--------------------------------|-------|--------------------------------|-------|--------------------------------|---------|--------------------------------|---------|--------------------------------|---------|
|           |            | 1 <sup>st</sup> sampling point |         | 2 <sup>nd</sup> sampling point |         | 4 <sup>th</sup> sampling point |         |  | 1 <sup>st</sup> sampling point |       | 2 <sup>nd</sup> sampling point |       | 4 <sup>th</sup> sampling point |       | 1 <sup>st</sup> sampling point |         | 2 <sup>nd</sup> sampling point |         | 4 <sup>th</sup> sampling point |         |
| SRF       | 0-1        | 0.09                           | ± 0.009 | 0.08                           | ± 0.010 | 0.13                           | ± 0.014 |  | 0.22                           | ± 0.7 | 0.17                           | ± 0.6 | 0.25                           | ± 1.7 | 0.02                           | ± 0.002 | 0.02                           | ± 0.001 | 0.02                           | ± 0.001 |
| INC       |            | 0.09                           | ± 0.009 | 0.08                           | ± 0.007 | 0.07                           | ± 0.032 |  | 0.21                           | ± 0.5 | 0.19                           | ± 0.7 | 0.22                           | ± 1.2 | 0.03                           | ± 0.001 | 0.02                           | ± 0.002 | 0.02                           | ± 0.001 |
| CON       |            | 0.05                           | ± 0.005 | 0.04                           | ± 0.003 | 0.08                           | ± 0.014 |  | 0.18                           | ± 0.5 | 0.18                           | ± 0.6 | 0.20                           | ± 1.9 | 0.02                           | ± 0.001 | 0.02                           | ± 0.001 | 0.02                           | ± 0.001 |
| SRF+S     |            | 0.07                           | ± 0.010 | 0.07                           | ± 0.001 | 0.10                           | ± 0.016 |  | 0.09                           | ± 0.1 | 0.16                           | ± 0.4 | 0.17                           | ± 1.2 | 0.02                           | ± 0.002 | 0.02                           | ± 0.002 | 0.02                           | ± 0.000 |
| INS+S     |            | 0.07                           | ± 0.014 | 0.10                           | ± 0.007 | 0.05                           | ± 0.003 |  | 0.07                           | ± 0.3 | 0.14                           | ± 0.7 | 0.14                           | ± 0.7 | 0.02                           | ± 0.002 | 0.02                           | ± 0.002 | 0.02                           | ± 0.001 |
| CON+S     |            | 0.02                           | ± 0.003 | 0.03                           | ± 0.003 | 0.07                           | ± 0.005 |  | 0.08                           | ± 0.5 | 0.09                           | ± 0.4 | 0.15                           | ± 0.2 | 0.02                           | ± 0.002 | 0.02                           | ± 0.001 | 0.03                           | ± 0.001 |
| SRF       | 1-10       | 0.06                           | ± 0.010 | 0.04                           | ± 0.004 | 0.06                           | ± 0.003 |  | 0.26                           | ± 0.6 | 0.20                           | ± 0.3 | 0.27                           | ± 1.5 | 0.02                           | ± 0.001 | 0.02                           | ± 0.002 | 0.02                           | ± 0.002 |
| INC       |            | 0.08                           | ± 0.004 | 0.10                           | ± 0.007 | 0.10                           | ± 0.009 |  | 0.19                           | ± 0.4 | 0.22                           | ± 0.9 | 0.24                           | ± 1.6 | 0.02                           | ± 0.001 | 0.02                           | ± 0.002 | 0.02                           | ± 0.001 |
| CON       |            | 0.04                           | ± 0.002 | 0.04                           | ± 0.003 | 0.05                           | ± 0.007 |  | 0.18                           | ± 0.6 | 0.20                           | ± 0.4 | 0.22                           | ± 1.1 | 0.02                           | ± 0.001 | 0.02                           | ± 0.001 | 0.02                           | ± 0.001 |
| SRF+S     |            | 0.05                           | ± 0.005 | 0.04                           | ± 0.006 | 0.04                           | ± 0.005 |  | 0.20                           | ± 0.7 | 0.18                           | ± 0.4 | 0.17                           | ± 0.6 | 0.02                           | ± 0.001 | 0.02                           | ± 0.000 | 0.02                           | ± 0.002 |
| INS+S     |            | 0.11                           | ± 0.011 | 0.09                           | ± 0.009 | 0.11                           | ± 0.018 |  | 0.22                           | ± 0.6 | 0.16                           | ± 0.5 | 0.18                           | ± 1.1 | 0.02                           | ± 0.001 | 0.02                           | ± 0.001 | 0.02                           | ± 0.000 |
| CON+S     |            | 0.04                           | ± 0.002 | 0.04                           | ± 0.005 | 0.05                           | ± 0.003 |  | 0.25                           | ± 0.2 | 0.17                           | ± 0.3 | 0.23                           | ± 0.5 | 0.02                           | ± 0.001 | 0.02                           | ± 0.001 | 0.02                           | ± 0.001 |
| SRF       | 10-20      | 0.04                           | ± 0.001 | 0.05                           | ± 0.006 | 0.07                           | ± 0.021 |  | 0.23                           | ± 0.4 | 0.20                           | ± 1.0 | 0.24                           | ± 0.8 | 0.02                           | ± 0.001 | 0.02                           | ± 0.002 | 0.02                           | ± 0.001 |
| INC       |            | 0.05                           | ± 0.002 | 0.05                           | ± 0.004 | 0.06                           | ± 0.006 |  | 0.21                           | ± 0.2 | 0.25                           | ± 0.6 | 0.28                           | ± 1.1 | 0.03                           | ± 0.002 | 0.02                           | ± 0.000 | 0.02                           | ± 0.002 |
| CON       |            | 0.04                           | ± 0.003 | 0.04                           | ± 0.005 | 0.07                           | ± 0.019 |  | 0.22                           | ± 0.4 | 0.20                           | ± 0.6 | 0.23                           | ± 0.9 | 0.02                           | ± 0.002 | 0.02                           | ± 0.001 | 0.02                           | ± 0.001 |
| SRF+S     |            | 0.04                           | ± 0.002 | 0.04                           | ± 0.005 | 0.04                           | ± 0.006 |  | 0.23                           | ± 0.5 | 0.18                           | ± 0.9 | 0.19                           | ± 1.0 | 0.02                           | ± 0.001 | 0.02                           | ± 0.001 | 0.03                           | ± 0.001 |
| INS+S     |            | 0.05                           | ± 0.006 | 0.08                           | ± 0.027 | 0.04                           | ± 0.006 |  | 0.25                           | ± 1.0 | 0.21                           | ± 0.4 | 0.21                           | ± 1.3 | 0.02                           | ± 0.001 | 0.02                           | ± 0.001 | 0.03                           | ± 0.001 |
| CON+S     |            | 0.05                           | ± 0.004 | 0.05                           | ± 0.013 | 0.07                           | ± 0.020 |  | 0.23                           | ± 0.4 | 0.20                           | ± 0.6 | 0.24                           | ± 0.5 | 0.03                           | ± 0.001 | 0.02                           | ± 0.001 | 0.02                           | ± 0.002 |



**Table S9:** (*nosZI* + *nosZII*)/16S rRNA bacteria and (*nirK* + *nirS* + *nosZI* + *nosZII*)/16S rRNA bacteria gene abundance ratios in CON, INC and SRF soil treatments in presence/absence of slurry (S) at three sampling depths (cm) and three sampling points. Averages and standard errors of 4 replicates are shown

| Treatment | Depth (cm) | <i>(nosZI + nosZII)/16S</i> rRNA bact. |                                |                                | <i>(nirK + nirS + nosZI + nosZII)/16S</i> rRNA bact. |                                |                                |
|-----------|------------|----------------------------------------|--------------------------------|--------------------------------|------------------------------------------------------|--------------------------------|--------------------------------|
|           |            | 1 <sup>st</sup> sampling point         | 2 <sup>nd</sup> sampling point | 4 <sup>th</sup> sampling point | 1 <sup>st</sup> sampling point                       | 2 <sup>nd</sup> sampling point | 4 <sup>th</sup> sampling point |
| SRF       | 0-1        | 0.13 ± 0.01                            | 0.09 ± 0.01                    | 0.13 ± 0.01                    | 0.38 ± 0.02                                          | 0.28 ± 0.03                    | 0.40 ± 0.04                    |
| INC       |            | 0.15 ± 0.01                            | 0.11 ± 0.01                    | 0.10 ± 0.03                    | 0.38 ± 0.02                                          | 0.32 ± 0.02                    | 0.28 ± 0.10                    |
| CON       |            | 0.11 ± 0.00                            | 0.09 ± 0.01                    | 0.10 ± 0.01                    | 0.32 ± 0.02                                          | 0.30 ± 0.02                    | 0.32 ± 0.02                    |
| SRF+S     |            | 0.08 ± 0.01                            | 0.11 ± 0.00                    | 0.11 ± 0.01                    | 0.18 ± 0.02                                          | 0.29 ± 0.01                    | 0.30 ± 0.04                    |
| INS+S     |            | 0.08 ± 0.01                            | 0.12 ± 0.01                    | 0.12 ± 0.01                    | 0.18 ± 0.02                                          | 0.28 ± 0.01                    | 0.29 ± 0.01                    |
| CON+S     |            | 0.09 ± 0.01                            | 0.09 ± 0.00                    | 0.11 ± 0.00                    | 0.19 ± 0.01                                          | 0.20 ± 0.02                    | 0.29 ± 0.01                    |
| SRF       | 1-10       | 0.13 ± 0.01                            | 0.11 ± 0.01                    | 0.13 ± 0.01                    | 0.41 ± 0.02                                          | 0.33 ± 0.03                    | 0.42 ± 0.03                    |
| INC       |            | 0.14 ± 0.01                            | 0.11 ± 0.02                    | 0.13 ± 0.01                    | 0.35 ± 0.03                                          | 0.36 ± 0.04                    | 0.40 ± 0.05                    |
| CON       |            | 0.11 ± 0.01                            | 0.09 ± 0.01                    | 0.11 ± 0.01                    | 0.31 ± 0.02                                          | 0.32 ± 0.02                    | 0.35 ± 0.03                    |
| SRF+S     |            | 0.10 ± 0.01                            | 0.09 ± 0.01                    | 0.09 ± 0.02                    | 0.32 ± 0.02                                          | 0.29 ± 0.02                    | 0.29 ± 0.04                    |
| INS+S     |            | 0.13 ± 0.01                            | 0.10 ± 0.01                    | 0.11 ± 0.01                    | 0.37 ± 0.01                                          | 0.28 ± 0.01                    | 0.31 ± 0.03                    |
| CON+S     |            | 0.13 ± 0.01                            | 0.10 ± 0.01                    | 0.13 ± 0.01                    | 0.41 ± 0.02                                          | 0.28 ± 0.01                    | 0.38 ± 0.02                    |
| SRF       | 10-20      | 0.13 ± 0.01                            | 0.10 ± 0.01                    | 0.13 ± 0.01                    | 0.39 ± 0.02                                          | 0.33 ± 0.04                    | 0.40 ± 0.03                    |
| INC       |            | 0.13 ± 0.02                            | 0.10 ± 0.01                    | 0.14 ± 0.02                    | 0.36 ± 0.03                                          | 0.36 ± 0.02                    | 0.44 ± 0.07                    |
| CON       |            | 0.10 ± 0.02                            | 0.09 ± 0.01                    | 0.11 ± 0.01                    | 0.34 ± 0.03                                          | 0.31 ± 0.01                    | 0.36 ± 0.04                    |
| SRF+S     |            | 0.10 ± 0.01                            | 0.08 ± 0.00                    | 0.09 ± 0.01                    | 0.35 ± 0.03                                          | 0.29 ± 0.02                    | 0.30 ± 0.05                    |
| INS+S     |            | 0.11 ± 0.01                            | 0.08 ± 0.03                    | 0.11 ± 0.01                    | 0.38 ± 0.03                                          | 0.34 ± 0.02                    | 0.35 ± 0.04                    |
| CON+S     |            | 0.14 ± 0.01                            | 0.10 ± 0.01                    | 0.11 ± 0.01                    | 0.40 ± 0.02                                          | 0.32 ± 0.01                    | 0.38 ± 0.03                    |

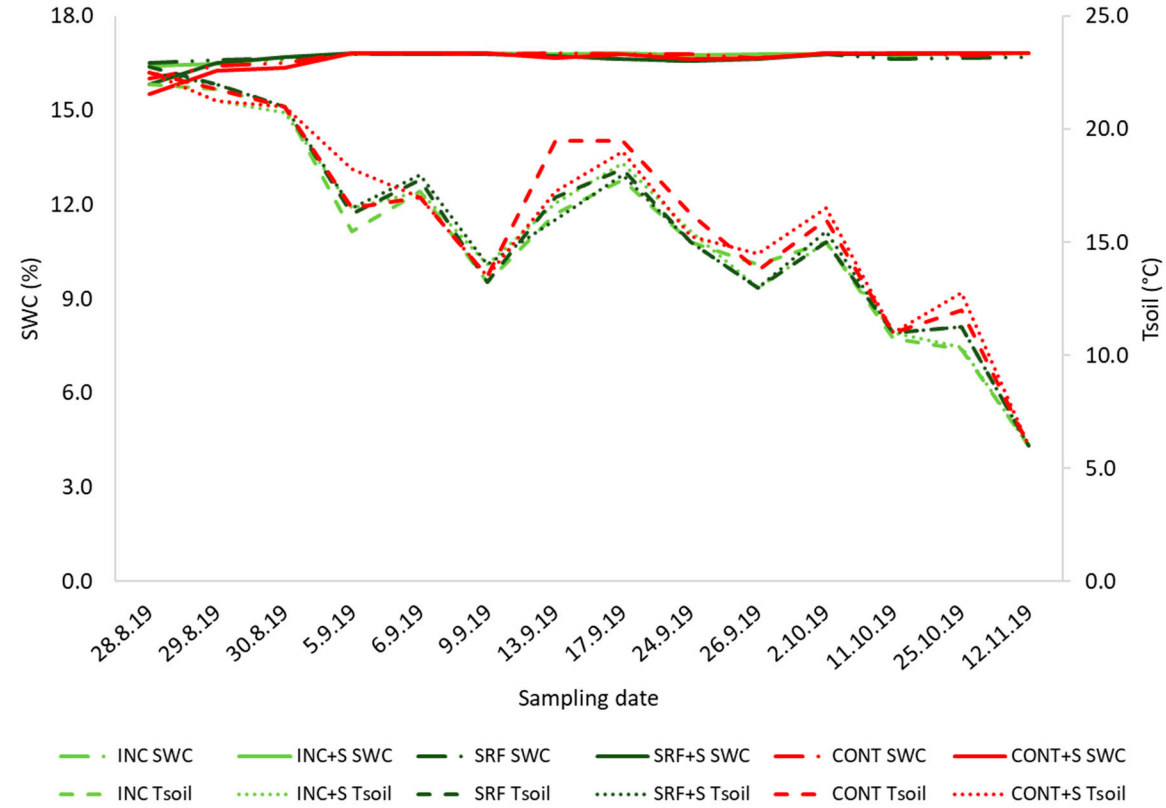

**Figure S1:** Measurements of soil water content (SWC) and soil temperature (T) at depth 10 cm in CON, INC and SRF soil treatments in presence/absence of slurry (S). Averages of 4 replicates are shown

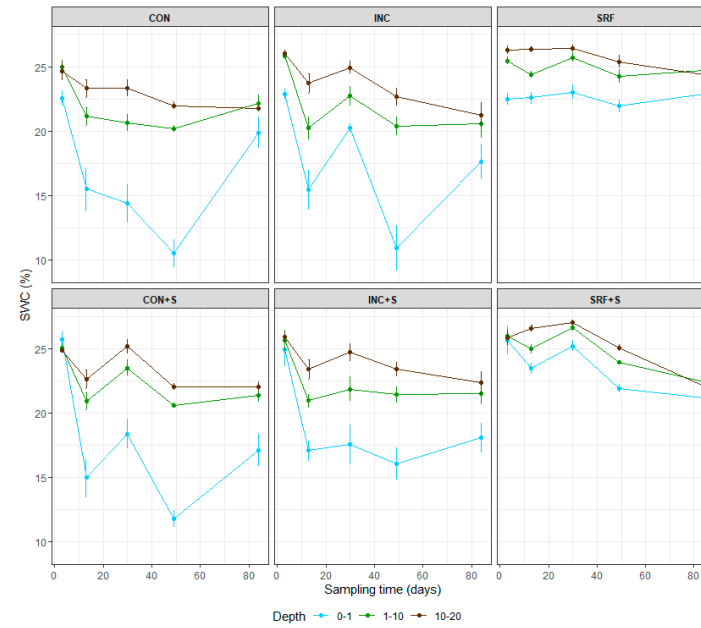

**Figure S2:** Measurements of soil water content (SWC) in CON, INC and SRF soil treatments in presence/absence of slurry (S) at three sampling depths (cm). Averages and standard errors of 4 replicates are shown

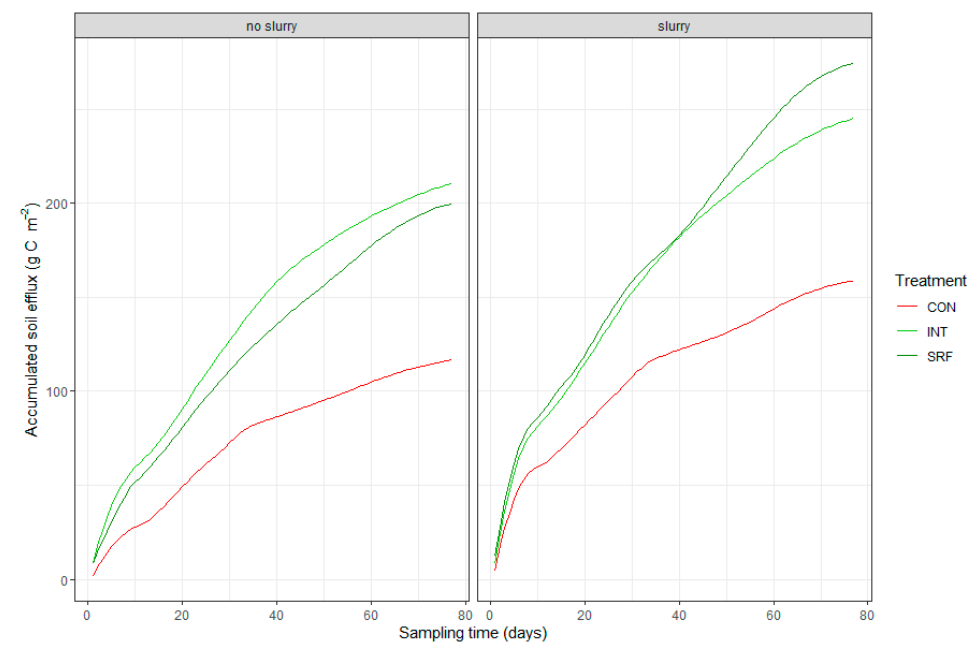

**Figure S3:** Cumulative CO<sub>2</sub> effluxes (g C m<sup>-2</sup>) in CON, INC and SRF soil treatments in presence/absence of slurry (S). Averages of 4 replicates are shown
